# Supplementary material for: B3LYP Study on Reduction Mechanisms from O2 to H2O at the Catalytic Sites of Fully Reduced and Mixed-Valence Bovine Cytochrome c Oxidases
Source: PubMed Central journal article supplement (PMC2852611; doi:10.1155/2010/182804), 2010-04-06
Supplement: 182804.f1.pdf [file 182804.f1.pdf]

Supporting Information

for

B3LYP Study on Reduction Mechanisms from O<sub>2</sub> to H<sub>2</sub>O at the Catalytic Sites of Fully Reduced  
and Mixed-Valence Bovine Cytochrome *c* Oxidases

Yasunori Yoshioka\* and Masaki Mitani

Chemistry Department for Materials, Graduate School of Engineering, Mie University,

Kurima-machiya 1577, Tsu, Mie 514-8507, Japan

**TABLE S1: Mulliken Charge ( $\rho$ ) and Spin ( $\sigma$ ) Populations (e) of Atoms and Groups in the Optimized Intermediates, 1- 4**

| Intermediates<br>( $C, 2S+1$ ) <sup>a</sup> | <b>1</b> |          | <b>2</b> |          | <b>3</b> |          | <b>4</b> |          |
|---------------------------------------------|----------|----------|----------|----------|----------|----------|----------|----------|
|                                             | (1, 3)   |          | (1, 1)   |          | (2, 1)   |          | (2, 1)   |          |
|                                             | $\rho$   | $\sigma$ | $\rho$   | $\sigma$ | $\rho$   | $\sigma$ | $\rho$   | $\sigma$ |
| Fe                                          | 1.504    | 2.151    | 1.664    | 1.062    | 1.672    | 1.055    | 1.674    | 0.964    |
| Cu                                          | 0.694    | 0.001    | 0.738    | -0.014   | 0.759    | -0.039   | 1.062    | -0.507   |
| Por                                         | -1.482   | -0.259   | -1.146   | -0.056   | -0.371   | -0.055   | -0.894   | -0.332   |
| H376                                        | 0.037    | 0.107    | 0.110    | 0.008    | 0.143    | 0.008    | 0.128    | -0.005   |
| H-T                                         | 0.092    | 0.000    | 0.062    | -0.002   | 0.105    | -0.001   | 0.148    | -0.035   |
| H290                                        | 0.026    | -0.000   | 0.015    | -0.001   | 0.030    | -0.000   | 0.163    | -0.108   |
| H291                                        | 0.080    | 0.000    | 0.066    | 0.000    | 0.090    | -0.001   | 0.180    | -0.048   |
| OO                                          |          |          | -0.553   | -0.996   | -0.599   | -0.959   |          |          |
| OOH                                         |          |          |          |          |          |          | -0.561   | 0.071    |
| W <sub>1</sub>                              | -0.017   | 0.000    | -0.010   | -0.001   | 0.044    | -0.007   | 0.028    | 0.000    |
| W <sub>2</sub>                              | 0.066    | 0.000    | 0.066    | 0.000    | 0.128    | 0.000    | 0.073    | 0.000    |
| Cu <sub>B</sub> <sup>b</sup>                | 0.892    | 0.001    | 0.881    | -0.017   | 0.984    | -0.041   | 1.553    | -0.698   |

<sup>a</sup> ( $C, 2S+1$ ) means (total charge, spin multiplicity).

<sup>b</sup>  $\rho(\text{Cu}_B) = \rho(\text{Cu}) + \rho(\text{H290}) + \rho(\text{H291}) + \rho(\text{H-T})$  and  $\sigma(\text{Cu}_B) = \sigma(\text{Cu}) + \sigma(\text{H290}) + \sigma(\text{H291}) + \sigma(\text{H-T})$ .

**TABLE S2: Mulliken Charge ( $\rho$ ) and Spin ( $\sigma$ ) Populations (e) of Atoms and Groups in the Optimized Intermediates, 4 - 7**

| Intermediates                 | <b>4</b>      |          | <b>5</b> |          | <b>6</b> |          | <b>7</b> |          |
|-------------------------------|---------------|----------|----------|----------|----------|----------|----------|----------|
|                               | $(C, 2S+1)^a$ |          | $(3, 1)$ |          | $(3, 1)$ |          | $(3, 1)$ |          |
|                               | $\rho$        | $\sigma$ | $\rho$   | $\sigma$ | $\rho$   | $\sigma$ | $\rho$   | $\sigma$ |
| Fe                            | 1.674         | 0.964    | 1.682    | 0.984    | 1.686    | 1.011    | 1.708    | 1.293    |
| Cu                            | 1.062         | -0.507   | 1.062    | -0.517   | 1.046    | -0.495   | 1.100    | -0.590   |
| Por                           | -0.894        | -0.332   | -0.120   | -0.314   | -0.729   | -0.350   | -0.173   | -1.079   |
| H376                          | 0.128         | -0.005   | 0.168    | -0.002   | 0.186    | -0.002   | 0.173    | -0.002   |
| H-T                           | 0.148         | -0.035   | 0.210    | -0.031   | 0.214    | -0.030   | 0.249    | -0.125   |
| H290                          | 0.163         | -0.108   | 0.190    | -0.128   | 0.189    | -0.115   | 0.267    | -0.211   |
| H291                          | 0.180         | -0.048   | 0.206    | -0.056   | 0.206    | -0.054   | 0.226    | -0.075   |
| OOH                           | -0.561        | 0.071    | -0.564   | 0.064    | -0.561   | 0.035    |          |          |
| O                             |               |          |          |          |          |          | -0.644   | 0.785    |
| H <sub>2</sub> O              |               |          |          |          |          |          | -0.004   | 0.005    |
| W <sub>1</sub>                | 0.028         | 0.000    | 0.026    | 0.000    |          |          | 0.015    | -0.000   |
| W <sub>1</sub> H <sup>+</sup> |               |          |          |          | 0.677    | 0.000    |          |          |
| W <sub>2</sub>                | 0.073         | 0.000    | 0.140    | 0.000    | 0.086    | 0.000    | 0.082    | 0.000    |
| Cu <sub>B</sub> <sup>b</sup>  | 1.553         | -0.698   | 1.668    | -0.732   | 1.655    | -0.694   | 1.842    | -1.001   |

<sup>a</sup>  $(C, 2S+1)$  means (total charge, spin multiplicity).

<sup>b</sup>  $\rho(\text{Cu}_B) = \rho(\text{Cu}) + \rho(\text{H290}) + \rho(\text{H291}) + \rho(\text{H-T})$  and  $\sigma(\text{Cu}_B) = \sigma(\text{Cu}) + \sigma(\text{H290}) + \sigma(\text{H291}) + \sigma(\text{H-T})$ .

**TABLE S3: Mulliken Charge ( $\rho$ ) and Spin ( $\sigma$ ) Populations (e) of Atoms and Groups in the Optimized Intermediates, 2 and 8 - 10**

| Intermediates<br>( $C, 2S+1$ ) <sup>a</sup> | <b>2</b> |          | <b>8</b> |          | <b>9</b> |          | <b>10</b> |          |
|---------------------------------------------|----------|----------|----------|----------|----------|----------|-----------|----------|
|                                             | (1, 1)   |          | (0, 2)   |          | (1, 2)   |          | (1, 2)    |          |
|                                             | $\rho$   | $\sigma$ | $\rho$   | $\sigma$ | $\rho$   | $\sigma$ | $\rho$    | $\sigma$ |
| Fe                                          | 1.664    | 1.062    | 1.561    | 0.157    | 1.575    | 0.233    | 1.667     | 0.934    |
| Cu                                          | 0.738    | -0.014   | 0.740    | 0.002    | 0.748    | 0.005    | 0.750     | -0.000   |
| Por                                         | -1.146   | -0.056   | -1.701   | -0.108   | -0.894   | -0.114   | -1.208    | -0.055   |
| H376                                        | 0.110    | 0.008    | 0.005    | -0.007   | 0.042    | -0.005   | 0.092     | -0.002   |
| H-T                                         | 0.062    | -0.002   | 0.047    | 0.002    | 0.037    | -0.001   | 0.057     | -0.000   |
| H290                                        | 0.015    | -0.001   | 0.002    | 0.001    | 0.018    | 0.001    | 0.018     | -0.000   |
| H291                                        | 0.066    | 0.000    | 0.048    | -0.000   | 0.066    | -0.000   | 0.062     | 0.000    |
| OO                                          | -0.553   | -0.996   | -0.724   | 0.953    | -0.743   | 0.875    |           |          |
| OOH                                         |          |          |          |          |          |          | -0.523    | 0.124    |
| W <sub>1</sub>                              | -0.010   | -0.001   | -0.011   | 0.000    | 0.034    | 0.006    | 0.017     | -0.000   |
| W <sub>2</sub>                              | 0.066    | 0.000    | 0.033    | -0.000   | 0.116    | -0.000   | 0.067     | 0.000    |
| Cu <sub>B</sub> <sup>b</sup>                | 0.881    | -0.017   | 0.838    | 0.005    | 0.869    | 0.005    | 0.887     | -0.000   |

<sup>a</sup> ( $C, 2S+1$ ) means (total charge, spin multiplicity).

<sup>b</sup>  $\rho(\text{Cu}_B) = \rho(\text{Cu}) + \rho(\text{H290}) + \rho(\text{H291}) + \rho(\text{H-T})$  and  $\sigma(\text{Cu}_B) = \sigma(\text{Cu}) + \sigma(\text{H290}) + \sigma(\text{H291}) + \sigma(\text{H-T})$ .

**TABLE S4: Mulliken Charge ( $\rho$ ) and Spin ( $\sigma$ ) Populations (e) of Atoms and Groups in the Optimized Intermediates, 10 - 13**

| Intermediates                 | <b>10</b> |          | <b>11</b> |          | <b>12</b> |          | <b>12a</b> |          | <b>13</b> |          |
|-------------------------------|-----------|----------|-----------|----------|-----------|----------|------------|----------|-----------|----------|
| $(C, 2S+1)^a$                 | (1, 2)    |          | (2, 2)    |          | (2, 2)    |          | (2, 2)     |          | (2, 2)    |          |
|                               | $\rho$    | $\sigma$ | $\rho$    | $\sigma$ | $\rho$    | $\sigma$ | $\rho$     | $\sigma$ | $\rho$    | $\sigma$ |
| Fe                            | 1.667     | 0.934    | 1.683     | 0.970    | 1.691     | 1.026    | 1.684      | 1.015    | 1.710     | 1.304    |
| Cu                            | 0.750     | -0.000   | 0.729     | -0.000   | 0.749     | -0.000   | 0.730      | 0.001    | 1.022     | -0.486   |
| Por                           | -1.208    | -0.055   | -0.413    | -0.059   | -1.032    | -0.045   | -1.013     | -0.044   | -0.813    | -0.386   |
| H376                          | 0.092     | -0.002   | 0.133     | 0.005    | 0.163     | -0.002   | 0.164      | -0.003   | 0.144     | 0.006    |
| H-T                           | 0.057     | -0.000   | 0.123     | -0.000   | 0.124     | 0.000    | 0.104      | 0.000    | 0.147     | -0.040   |
| H290                          | 0.018     | -0.000   | 0.058     | -0.000   | 0.097     | -0.000   | 0.036      | 0.000    | 0.186     | -0.136   |
| H291                          | 0.062     | 0.000    | 0.106     | -0.000   | 0.125     | -0.000   | 0.093      | -0.000   | 0.181     | -0.049   |
| OOH                           | -0.523    | 0.124    | -0.583    | 0.084    |           |          |            |          |           |          |
| O                             |           |          |           |          | -0.457    | 0.024    | -0.449     | 0.037    | -0.650    | 0.774    |
| H <sub>2</sub> O <sup>b</sup> |           |          |           |          | 0.392     | -0.003   | 0.494      | -0.006   | 0.010     | 0.013    |
| W <sub>1</sub>                | 0.017     | -0.000   | 0.038     | 0.000    | 0.072     | -0.000   | 0.082      | -0.000   | -0.007    | -0.000   |
| W <sub>2</sub>                | 0.067     | 0.000    | 0.126     | 0.000    | 0.075     | 0.000    | 0.074      | 0.000    | 0.071     | 0.000    |
| Cu <sub>B</sub> <sup>c</sup>  | 0.887     | -0.000   | 1.016     | -0.000   | 1.095     | -0.000   | 0.964      | 0.001    | 1.536     | -0.711   |

<sup>a</sup>  $(C, 2S+1)$  means (total charge, spin multiplicity).

<sup>b</sup> First H<sub>2</sub>O produced.

<sup>c</sup>  $\rho(\text{Cu}_B) = \rho(\text{Cu}) + \rho(\text{H290}) + \rho(\text{H291}) + \rho(\text{H-T})$  and  $\sigma(\text{Cu}_B) = \sigma(\text{Cu}) + \sigma(\text{H290}) + \sigma(\text{H291}) + \sigma(\text{H-T})$ .

**TABLE S5: Mulliken Charge ( $\rho$ ) and Spin ( $\sigma$ ) Populations (e) of Atoms and Groups in the Optimized Intermediates, 13 - 17**

| Intermediates                 | <b>13</b> |          | <b>14</b> |          | <b>15</b> |          | <b>16</b> |          | <b>17</b> |          |
|-------------------------------|-----------|----------|-----------|----------|-----------|----------|-----------|----------|-----------|----------|
| ( $C, 2S+1$ ) <sup>a</sup>    | (2, 2)    |          | (2, 2)    |          | (1, 3)    |          | (2, 3)    |          | (3, 3)    |          |
|                               | $\rho$    | $\sigma$ | $\rho$    | $\sigma$ | $\rho$    | $\sigma$ | $\rho$    | $\sigma$ | $\rho$    | $\sigma$ |
| Fe                            | 1.710     | 1.304    | 1.751     | 1.459    | 1.693     | 0.971    | 1.709     | 1.027    | 1.685     | 1.024    |
| Cu                            | 1.022     | -0.486   | 1.153     | -0.637   | 1.097     | 0.559    | 1.127     | 0.599    | 1.132     | 0.622    |
| Por                           | -0.813    | -0.386   | -0.971    | -0.106   | -1.198    | -0.066   | -1.050    | -0.049   | -0.923    | -0.023   |
| H376                          | 0.144     | 0.006    | 0.166     | 0.013    | 0.119     | 0.015    | 0.181     | 0.011    | 0.238     | 0.003    |
| H-T                           | 0.147     | -0.040   | 0.143     | -0.082   | 0.093     | 0.063    | 0.143     | 0.067    | 0.191     | 0.087    |
| H290                          | 0.186     | -0.136   | 0.194     | -0.112   | 0.100     | 0.035    | 0.137     | 0.050    | 0.218     | 0.123    |
| H291                          | 0.181     | -0.049   | 0.194     | -0.101   | 0.141     | 0.084    | 0.175     | 0.098    | 0.221     | 0.113    |
| O                             | -0.650    | 0.774    | -0.740    | 0.619    |           |          |           |          |           |          |
| OH(Fe)                        |           |          |           |          | -0.538    | 0.076    |           |          |           |          |
| H <sub>2</sub> O <sup>b</sup> | 0.010     | 0.013    | 0.009     | 0.013    | -0.009    | 0.003    | 0.012     | -0.000   | 0.019     | 0.000    |
| H <sub>2</sub> O <sup>c</sup> |           |          |           |          |           |          | -0.019    | 0.013    | 0.015     | -0.004   |
| W <sub>1</sub>                | -0.007    | -0.000   | -0.006    | -0.000   | -0.044    | 0.000    | 0.029     | 0.000    | 0.046     | 0.000    |
| W <sub>2</sub>                | 0.071     | 0.000    | 0.072     | 0.000    | 0.065     | 0.000    | 0.072     | 0.000    | 0.078     | -0.000   |
| W <sub>3</sub>                |           |          | 0.035     | -0.065   |           |          |           |          | 0.079     | 0.056    |
| OH(W <sub>3</sub> )           |           |          |           |          | -0.518    | 0.260    | -0.517    | 0.185    |           |          |
| Cu <sub>B</sub> <sup>d</sup>  | 1.536     | -0.711   | 1.684     | -0.932   | 1.431     | 0.741    | 1.582     | 0.814    | 1.761     | 0.945    |

<sup>a</sup> ( $C, 2S+1$ ) means (total charge, spin multiplicity).

<sup>b</sup> First H<sub>2</sub>O produced.

<sup>c</sup> Second H<sub>2</sub>O produced.

<sup>d</sup>  $\rho(\text{Cu}_B) = \rho(\text{Cu}) + \rho(\text{H290}) + \rho(\text{H291}) + \rho(\text{H-T})$  and  $\sigma(\text{Cu}_B) = \sigma(\text{Cu}) + \sigma(\text{H290}) + \sigma(\text{H291}) + \sigma(\text{H-T})$ .

**TABLE S6: Mulliken Charge ( $\rho$ ) and Spin ( $\sigma$ ) Populations (e) of Atoms and Groups in the Optimized Intermediates, 17 – 19 and 1**

| Intermediates<br>( $C, 2S+1$ ) <sup>a</sup> | <b>17</b> |          | <b>18</b> |          | <b>19</b> |          | <b>1</b> |          |
|---------------------------------------------|-----------|----------|-----------|----------|-----------|----------|----------|----------|
|                                             | (3, 3)    |          | (3, 3)    |          | (2, 4)    |          | (1, 3)   |          |
|                                             | $\rho$    | $\sigma$ | $\rho$    | $\sigma$ | $\rho$    | $\sigma$ | $\rho$   | $\sigma$ |
| Fe                                          | 1.685     | 1.024    | 1.585     | 1.093    | 1.596     | 2.538    | 1.504    | 2.151    |
| Cu                                          | 1.132     | 0.622    | 1.134     | 0.614    | 0.946     | 0.340    | 0.694    | 0.001    |
| Por                                         | -0.923    | -0.023   | -0.808    | -0.072   | -1.107    | -0.141   | -1.482   | -0.259   |
| H376                                        | 0.238     | 0.003    | 0.270     | -0.021   | 0.107     | 0.148    | 0.037    | 0.107    |
| H-T                                         | 0.190     | 0.087    | 0.200     | 0.092    | 0.116     | 0.021    | 0.092    | 0.000    |
| H290                                        | 0.218     | 0.123    | 0.240     | 0.130    | 0.123     | 0.047    | 0.026    | -0.000   |
| H291                                        | 0.221     | 0.113    | 0.213     | 0.108    | 0.122     | 0.034    | 0.080    | 0.000    |
| H <sub>2</sub> O <sup>b</sup>               | 0.019     | 0.000    |           |          |           |          |          |          |
| H <sub>2</sub> O <sup>c</sup>               | 0.015     | -0.004   |           |          |           |          |          |          |
| W <sub>1</sub>                              | 0.046     | 0.000    | -0.004    | 0.001    | -0.011    | 0.000    | -0.017   | 0.000    |
| W <sub>2</sub>                              | 0.078     | -0.000   | 0.082     | 0.000    | 0.073     | 0.000    | 0.066    | 0.000    |
| W <sub>3</sub>                              | 0.079     | 0.056    | 0.086     | 0.055    | 0.036     | 0.013    |          |          |
| Cu <sub>B</sub> <sup>d</sup>                | 1.761     | 0.945    | 1.787     | 0.944    | 1.306     | 0.441    | 0.892    | 0.001    |

<sup>a</sup> ( $C, 2S+1$ ) means (total charge, spin multiplicity).

<sup>b</sup> First H<sub>2</sub>O produced.

<sup>c</sup> Second H<sub>2</sub>O produced.

<sup>d</sup>  $\rho(\text{Cu}_B) = \rho(\text{Cu}) + \rho(\text{H290}) + \rho(\text{H291}) + \rho(\text{H-T})$  and  $\sigma(\text{Cu}_B) = \sigma(\text{Cu}) + \sigma(\text{H290}) + \sigma(\text{H291}) + \sigma(\text{H-T})$ .

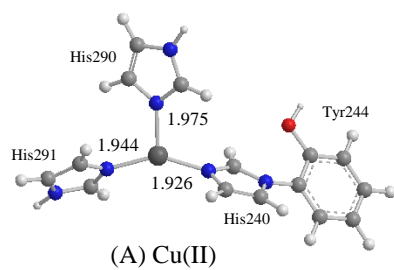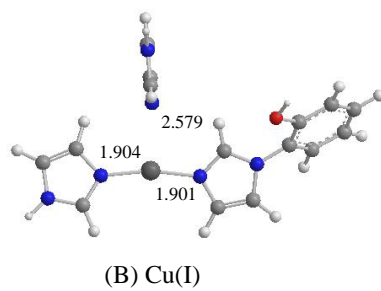

**FIGURE S1:** Y. Yoshioka et al.

**FIGURE S1:** Optimized geometries of the Cu<sub>B</sub> site for Cu(II) and Cu(I) without coordination of a H<sub>2</sub>O molecule.



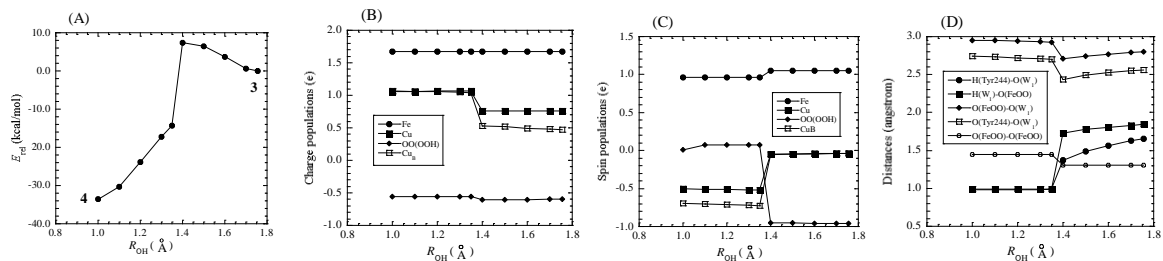

**FIGURE S2:** Y. Yoshioka et al.

**FIGURE S2:** Variations of properties with move of the H-atom from  $-\text{CH}_2\text{OH}$  to the  $O_c$ -atom of Tyr244. (A) Relative energy, (B) charge populations, (C) spin populations, and (D) atomic distances.

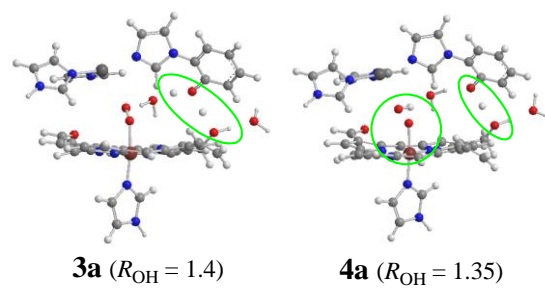

**FIGURE S3:** Y. Yoshioka et al.

**FIGURE S3:** Geometries at  $R_{\text{OH}} = 1.4$  and  $1.35 \text{ \AA}$  on the way that the H-atom moves from  $-\text{CH}_2\text{OH}$  to the  $\text{O}_c$ -atom of Tyr244.

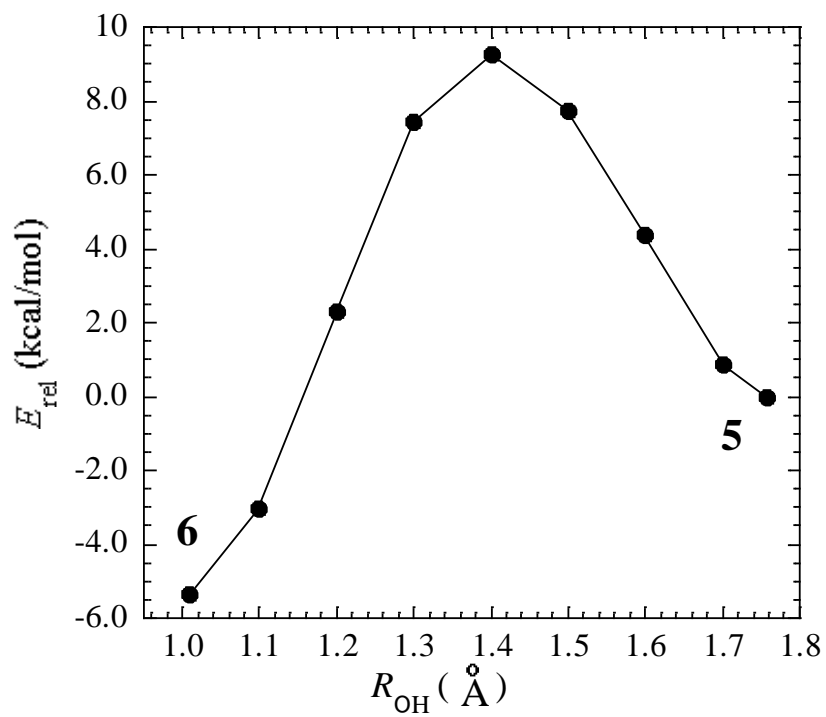

**FIGURE S4:** Y. Yoshioka et al.

**FIGURE S4:** Variations of relative energy with move of the H-atom from  $-\text{CH}_2\text{OH}$  to the  $\text{O}_c$ -atom of Tyr244.

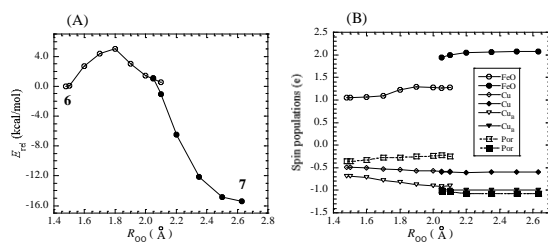

**FIGURE S5:** Y. Yoshioka et al.

**FIGURE S5:** Variations of (A) relative energy and (B) spin populations for formation of first  $\text{H}_2\text{O}$  molecule in MV CcO.

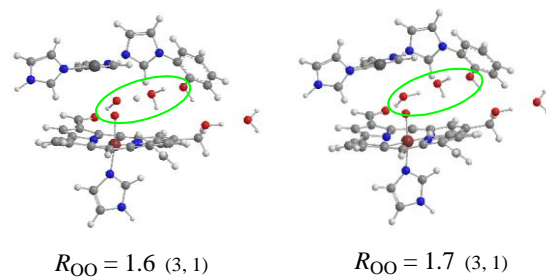

**FIGURE S6:** Y. Yoshioka et al.

**FIGURE S6:** Geometries at  $R_{00} = 1.6$  and  $1.7 \text{ \AA}$  on the way from **6** ( $R_{00} = 1.479 \text{ \AA}$ ) to **7** ( $R_{00} = 2.631 \text{ \AA}$ ).

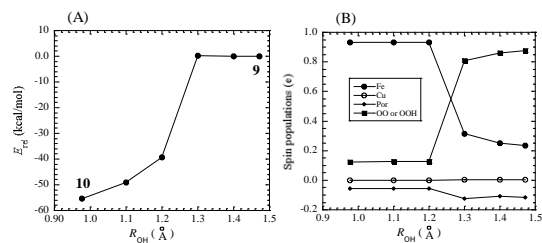

**FIGURE S7:** Y. Yoshioka et al.

**FIGURE S7:** Variations of (A) relative energy and (B) spin populations with move of the H-atom from the O-atom of Tyr244 to  $W_1$ .

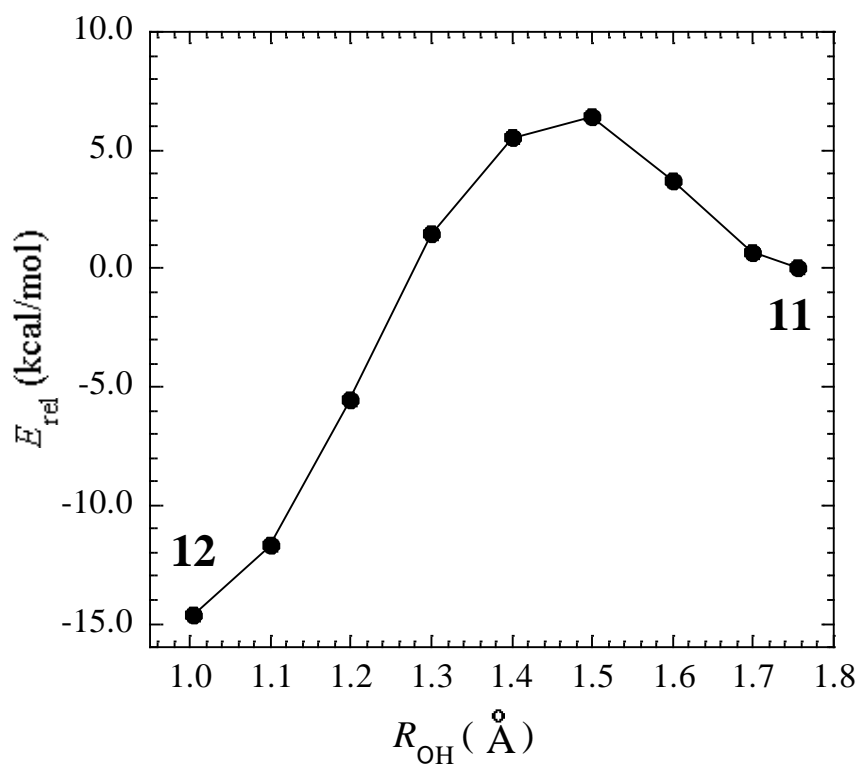

**FIGURE S8:** Y. Yoshioka et al.

**FIGURE S8:** Variations of relative energy from **11** to **12** with movement of a proton from –  
CH<sub>2</sub>OH to Tyr244.

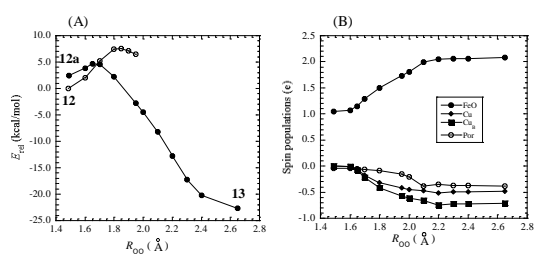

**FIGURE S9:** Y. Yoshioka et al.

**FIGURE S9:** Variations of (A) relative energy and (B) spin populations for formation of first H<sub>2</sub>O molecule in FR CcO.



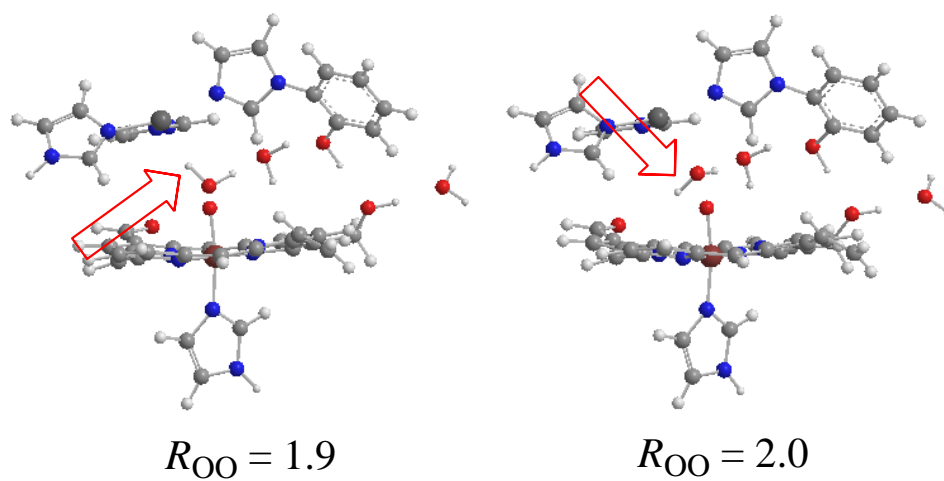

**FIGURE S10:** Y. Yoshioka et al.

**FIGURE S10:** Geometries at  $R_{OH} = 1.9$  and  $2.0 \text{ \AA}$  on the way that the O-O bond cleaves to produce the first  $\text{H}_2\text{O}$  molecule in FR CcO.
